# Supplementary material for: Construction of Co@N-CNTs grown on N-MoxC nanosheets for separator modification to enhance adsorption and catalytic conversion of polysulfides in Li–S batteries
Source: Royal Society of Chemistry journal article supplement (doi:10.1039/d2ta09123b), 2022-12-14
Supplement: d2ta09123b1.pdf [file d2ta09123b1.pdf]

## Electronic Supporting Information for

---

**Construction of Co@N-CNTs grown on N-Mo<sub>x</sub>C nanosheets for separator modification to enhance adsorption and catalytic conversion of polysulfides in Li-S batteries**

*Guoqiang Zhao, Sen Liu, Xu Zhang, Yamin Zhang, Huan Shi, Yang Liu\*, Linrui Hou\*,  
Changzhou Yuan\**

School of Materials Science & Engineering, University of Jinan, Jinan, 250022, P. R.

China

E-mail: mse\_liuy@ujn.edu.cn (*Prof. Y. Liu*)

mse\_houlr@ujn.edu.cn (*Prof. L. Hou*)

ayuancz@163.com; mse\_yuancz@ujn.edu.cn (*Prof. C. Yuan*)

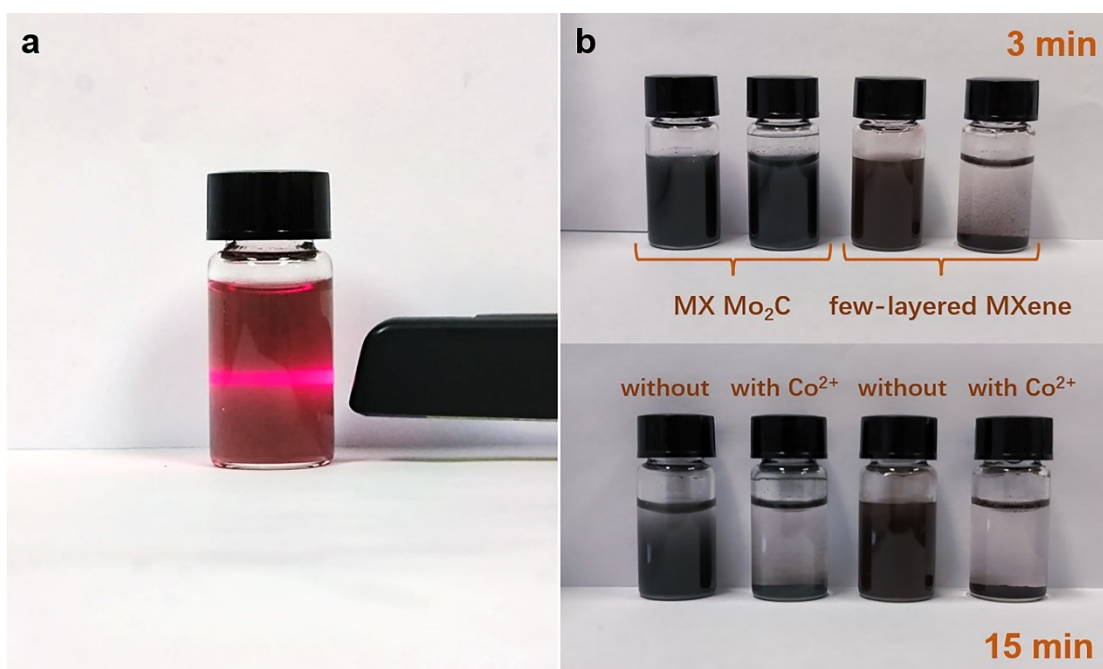

**Fig. S1** (a) Tyndall effect in dispersive solution of few-layered MXene, (b) The cobalt ions closely attached to the negatively charged few-layered MXene nanosheets by electrostatic force.

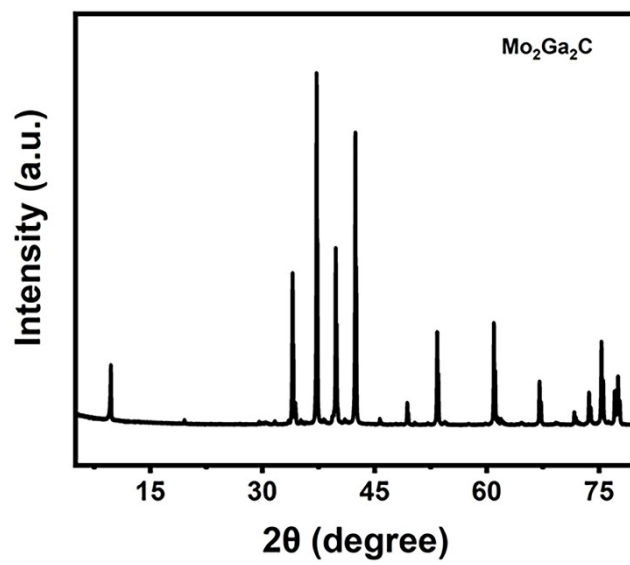

Fig. S2 XRD patterns of Mo<sub>2</sub>Ga<sub>2</sub>C MAX.

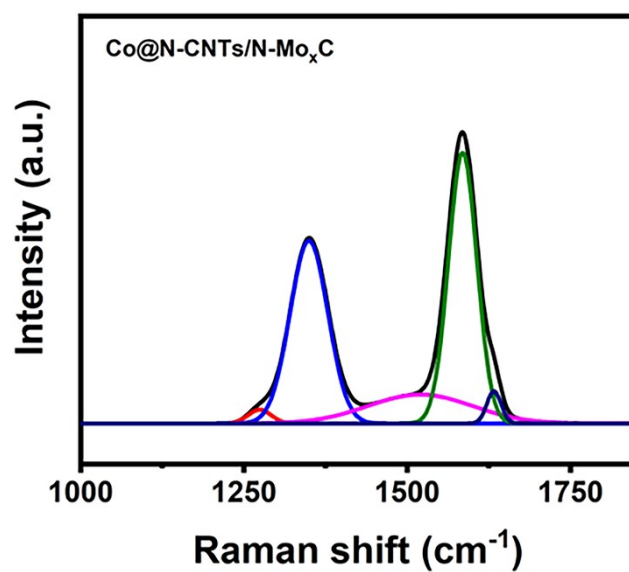

**Fig. S3** Raman spectrum and corresponding fitted profiles of Co@N-CNTs/N-Mo<sub>x</sub>C.

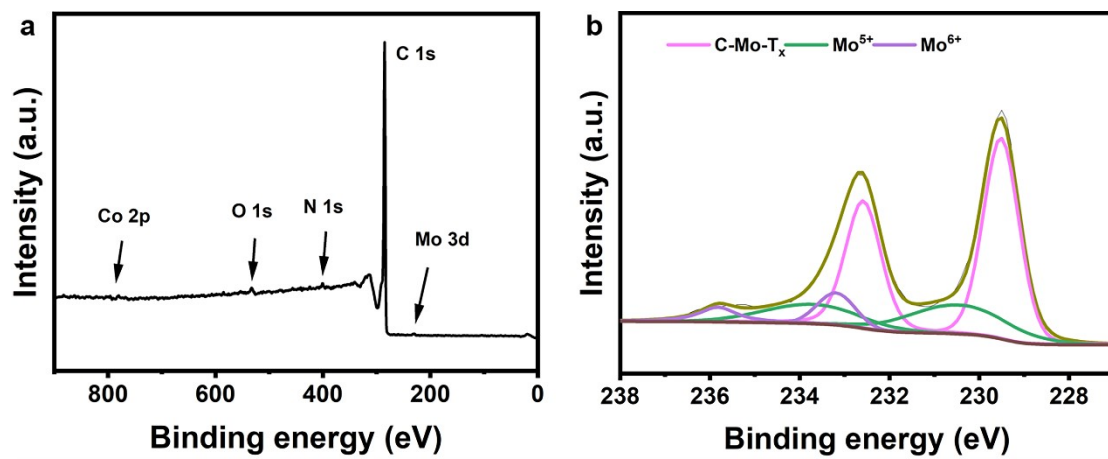

**Fig. S4** (a) XPS survey spectrum of Co@N-CNTs/N-Mo<sub>x</sub>C, and (b) Mo 3d spectra of MX Mo<sub>2</sub>C.

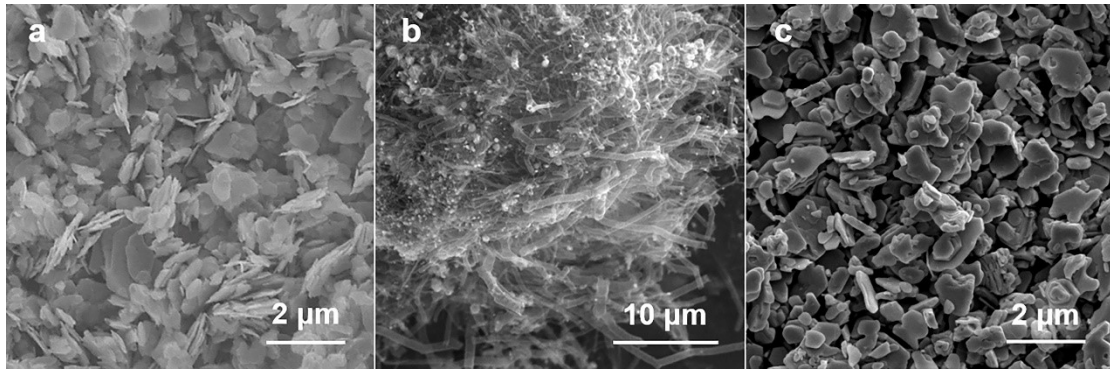

**Fig. S5** SEM images of (a) N-Mo<sub>x</sub>C, (b) Co@N-CNTs and (c) MX Mo<sub>2</sub>C.

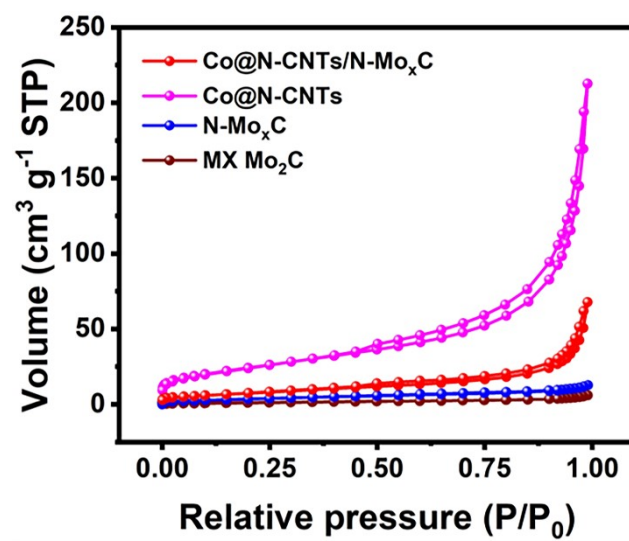

**Fig. S6** N<sub>2</sub> adsorption-desorption curves of Co@N-CNTs/N-Mo<sub>x</sub>C, Co@N-CNTs, N-Mo<sub>x</sub>C and MX Mo<sub>2</sub>C as indicated.

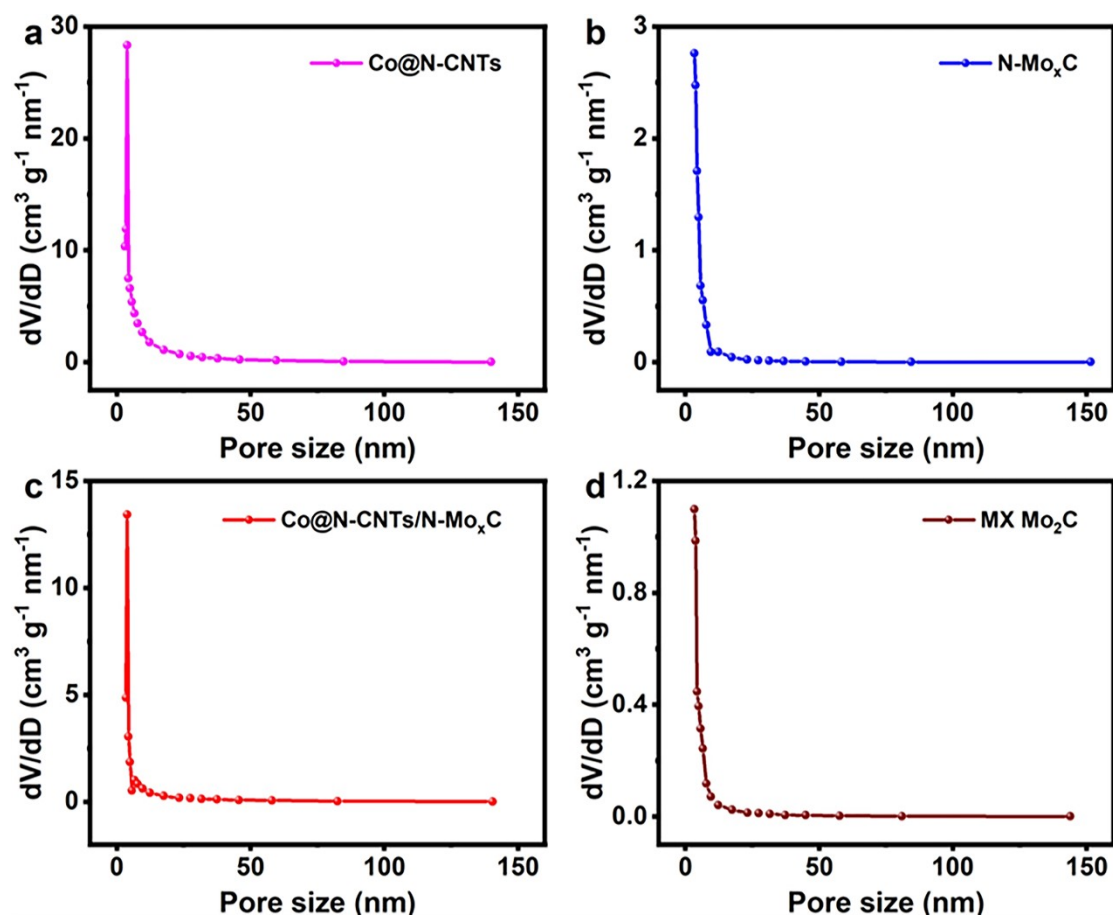

**Fig. S7** Pore size distribution of (a) Co@N-CNTs, (b) N-Mo<sub>x</sub>C, (c) Co@N-CNTs/N-Mo<sub>x</sub>C and (d) MX Mo<sub>2</sub>C.



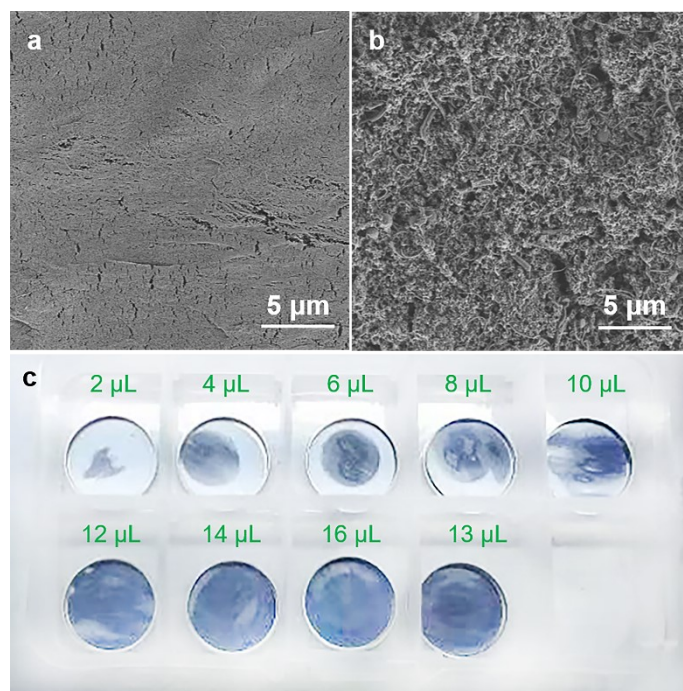

**Fig. S8** SEM images of (a) PP separator and (b) coating surface for Co@N-CNTs/N-Mo<sub>x</sub>C. (c) Digital photographs for the amount of electrolyte required to moisten the modified separator.

Gradient analysis (2, 4, 6, 8, 10, 12, 14, and 16  $\mu\text{L}$ ) was carried out to explore the amount of electrolyte necessary for the moisten the modified separator. With the increase in the amount of electrolyte, the wetting area of the modified separator expands. When the amount of electrolyte reached 12  $\mu\text{L}$ , only two points of the modified separator were not completely wetted. When the electrolyte dosage reached 14 and 16  $\mu\text{L}$ , it was fully wetted. For a more accurate reaction, the wetting condition was verified when the electrolyte dosage was 13  $\mu\text{L}$ . The results showed that the necessary electrolyte dosage to wet modified separator was 13  $\mu\text{L}$ . However, to achieve a good Li-sulfur battery performance test, we used the electrolyte dosage of 20  $\mu\text{L mg}^{-1}$  (the amount of electrolyte used per milligram of sulfur) for relevant

characterization.

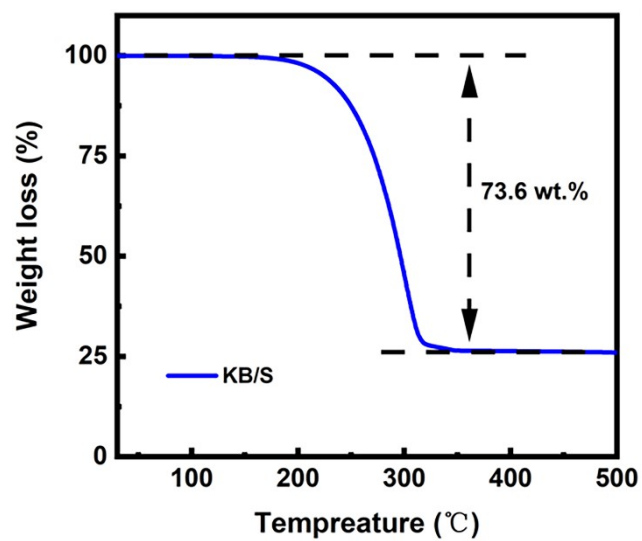

**Fig. S9** TG diagram of KB/S for checking the sulfur loading.

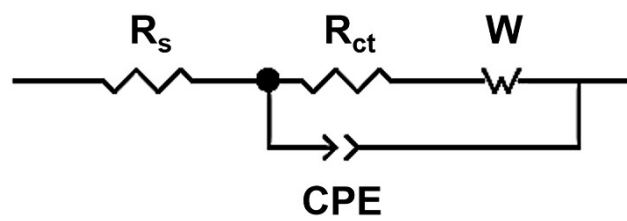

**Fig. S10** Equivalent circuit diagram for EIS fitting.

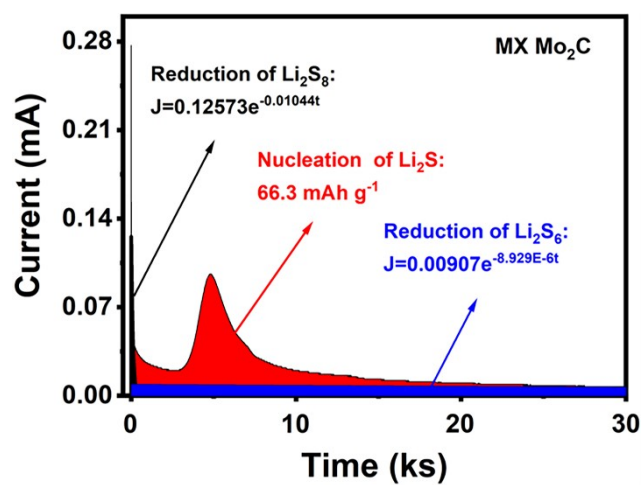

Fig. S11 Li<sub>2</sub>S nucleation test of MX Mo<sub>2</sub>C electrode.

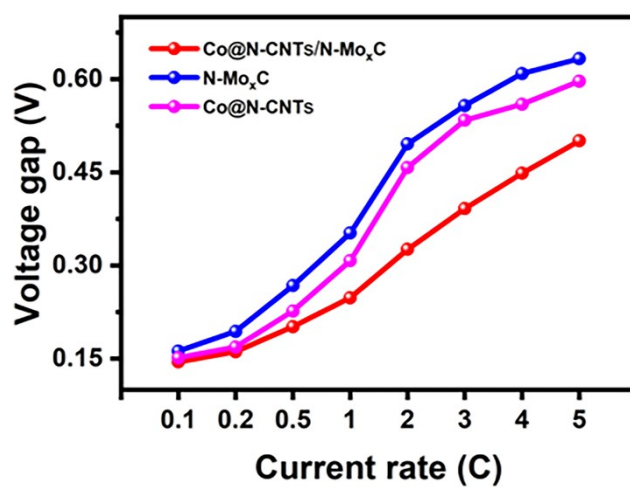

**Fig. S12** The charge-discharge platform voltage gaps of cells with different separators under different current densities.

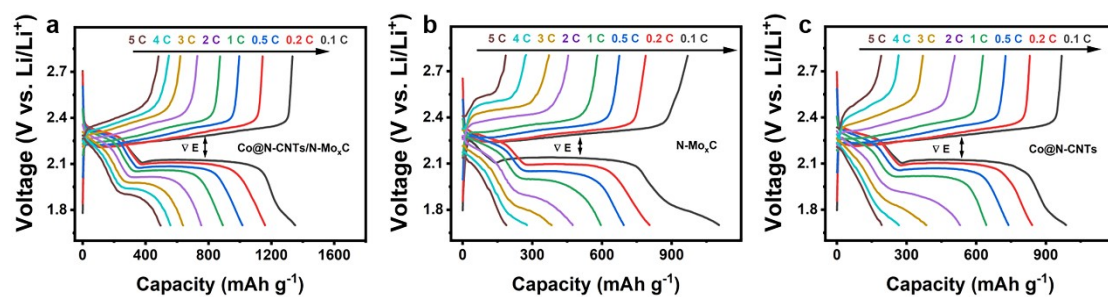

**Fig. S13** Charge-discharge curve under a different current density of (a) Co@N-CNTs/N-Mo<sub>x</sub>C, (b) N-Mo<sub>x</sub>C and (c) Co@N-CNTs separators.

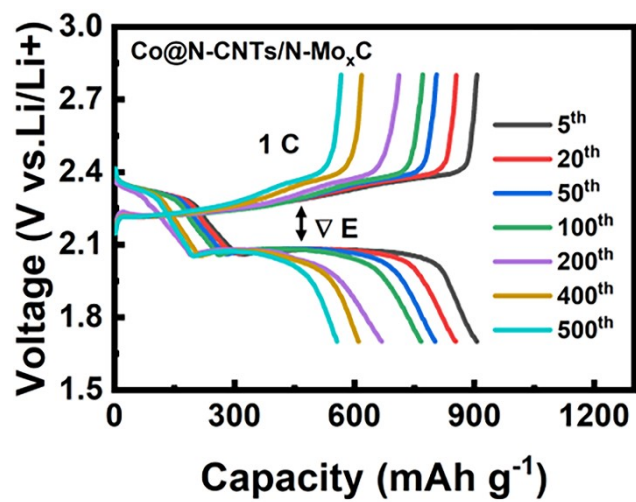

**Fig. S14** Charge-discharge curve of Co@N-CNTs/N-Mo<sub>x</sub>C separator under different cycles as indicated at 1 C.



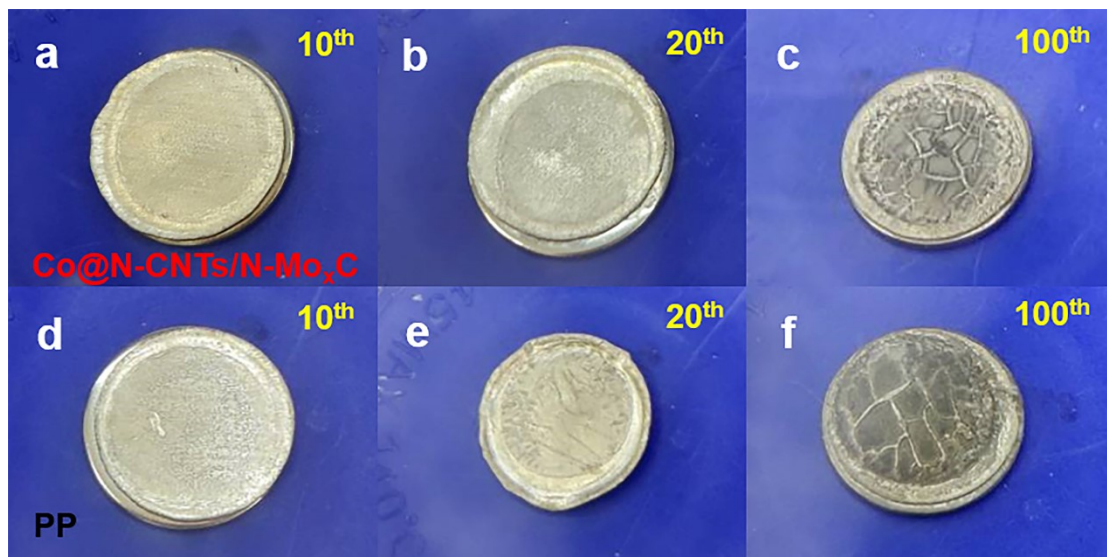

**Fig. S15** Digital photos of lithium anodes after different times of charge and discharge cycles.

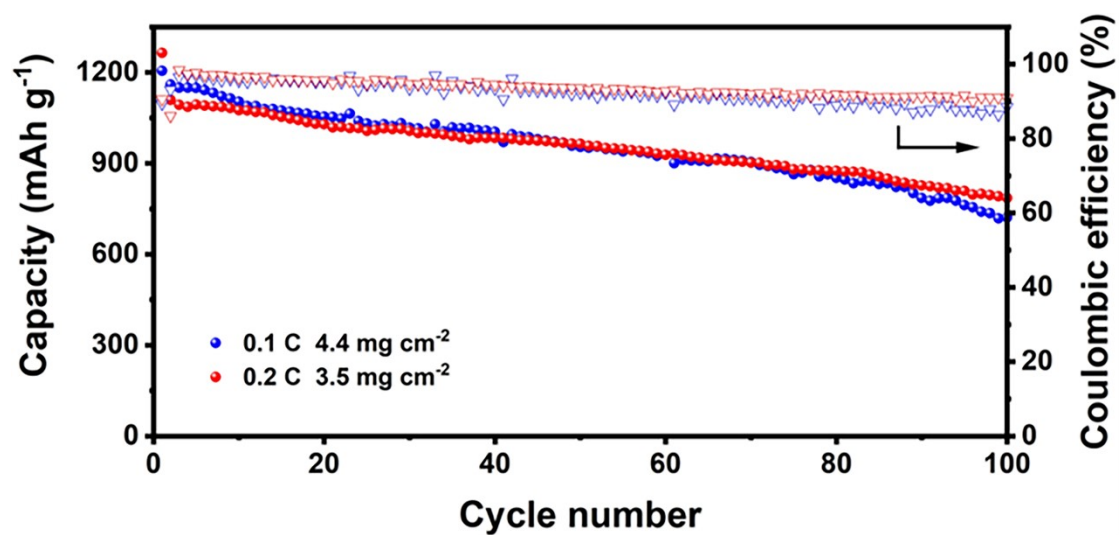

**Fig. S16** Cycling stability of the cells with Co@N-CNTs/N-Mo<sub>x</sub>C separator under high sulfur loading: 4.4 mg cm<sup>-2</sup> at 0.1 C, 3.5 mg cm<sup>-2</sup> at 0.2 C.

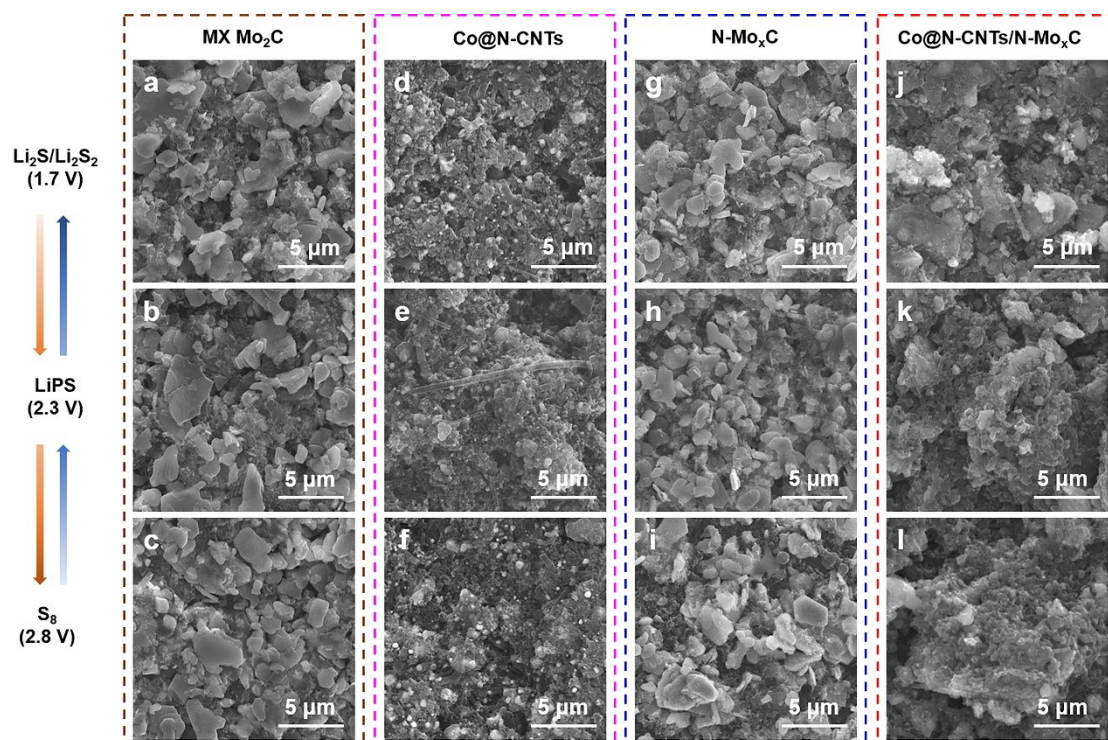

**Fig. S17** SEM images of various modified layers after 10 cycles under different voltages as indicated.

To further clarify the role of Co@N-CNTs/N-Mo<sub>x</sub>C in the aggregation of polysulfide and inhibition of sulfur aggregation, the cells were disassembled after 10 charge-discharge cycles at 1 C. SEM images of different modified layers at different voltages (1.7, 2.3, 2.8 V) are shown in **Fig. S17**. Taking Co@N-CNTs/N-Mo<sub>x</sub>C as an example, at 2.8 V, S<sub>8</sub> (solid) deposited on the surface of Co@N-CNTs/N-Mo<sub>x</sub>C layer and encapsulated it. Upon discharge to 2.3 V, S<sub>8</sub> is transformed into Li<sub>2</sub>S<sub>n</sub> (soluble, n = 4 or 6) and Co@N-CNTs/N-Mo<sub>x</sub>C exposes its 3D structure. When discharged to 1.7 V, Li<sub>2</sub>S<sub>n</sub> are further transformed into Li<sub>2</sub>S<sub>2</sub>/Li<sub>2</sub>S (solid) and deposited on the Co@N-CNTs/N-Mo<sub>x</sub>C layer.

**Table S1** Atomic information of Co@N-CNTs/N-Mo<sub>x</sub>C

| Name  | Atomic (%) |
|-------|------------|
| Mo 3d | 0.1        |
| C 1s  | 95.7       |
| N 1s  | 2.4        |
| O 1s  | 1.5        |
| Co 2P | 0.3        |

**Table S2** Specific surface area obtained in the BET test

| Sample                        | Specific surface area (m <sup>2</sup> g <sup>-1</sup> ) |
|-------------------------------|---------------------------------------------------------|
| Co@N-CNTs/N-Mo <sub>x</sub> C | 28                                                      |
| Co@N-CNTs                     | 89                                                      |
| N-Mo <sub>x</sub> C           | 13                                                      |
| MX Mo <sub>2</sub> C          | 5                                                       |

**Table S3** The information obtained by fitting the electrochemical impedance

| Modified separators           | $R_s$ ( $\Omega$ ) | $R_{ct}$ ( $\Omega$ ) |
|-------------------------------|--------------------|-----------------------|
| Co@N-CNTs/N-Mo <sub>x</sub> C | 1.08               | 49.31                 |
| Co@N-CNTs                     | 1.13               | 64.02                 |
| N-Mo <sub>x</sub> C           | 1.35               | 74.19                 |
| MX Mo <sub>2</sub> C          | 2.14               | 86.95                 |
| PP                            | 2.21               | 104.80                |
